# Supplementary material for: Controllable synthesis of Ni/SiO2 hollow spheres and their excellent catalytic performance in 4-nitrophenol reduction
Source: Royal Society of Chemistry journal article supplement (doi:10.1039/c4dt02385d), 2014-01-01
Supplement: c4dt02385d1.pdf [file c4dt02385d1.pdf]

## **Controllable synthesis of Ni/SiO<sub>2</sub> hollow spheres and excellent catalytic performance in 4-introphenol reduction**

Zhongyi Niu, Shenghuan Zhang, Yanbo Sun\*, Shili Gai, Fei He, Yunlu Dai, Lei Li,  
and Piaoping Yang\*

**Table S1** Experimental conditions for the synthesis of SiO<sub>2</sub> particles with different sizes <sup>a</sup>

| SiO <sub>2</sub> (nm) | V(TEOS) | V(H <sub>2</sub> O) | V(NH <sub>3</sub> ) | V(C <sub>2</sub> H <sub>5</sub> OH) |
|-----------------------|---------|---------------------|---------------------|-------------------------------------|
| 140                   | 14      | 49.8                | 27.9                | 277.2                               |
| 210                   | 14      | 31.4                | 183                 | 119.8                               |
| 350                   | 14      | 28.2                | 164.8               | 106.4                               |
| 580                   | 14      | 4                   | 117.8               | 88.2                                |

a V: volume (mL)

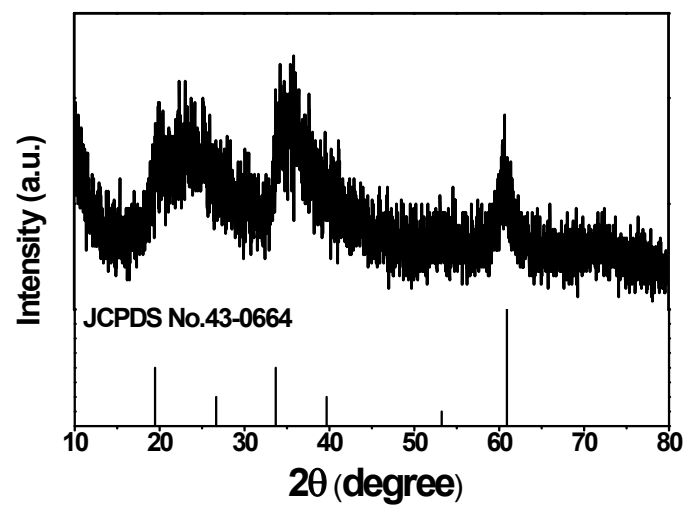

**Fig. S1** XRD pattern of nickel silicate.

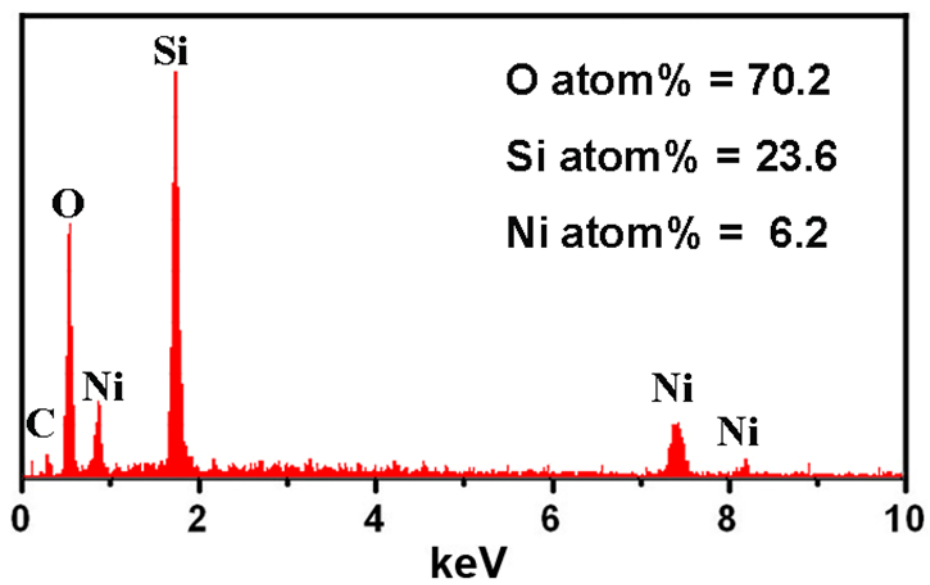

**Fig. S2** EDS spectrum of nickel silicate.

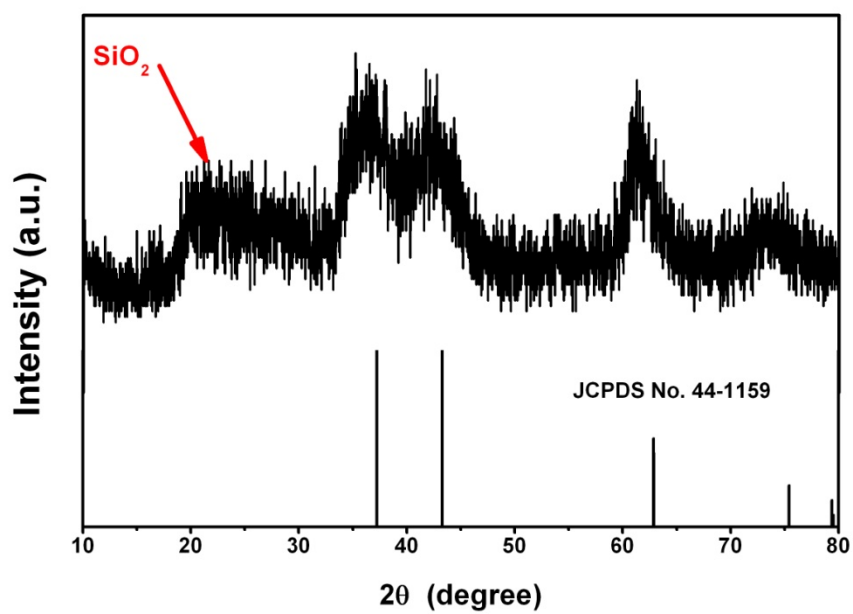

**Fig. S3** XRD pattern of NiO/SiO<sub>2</sub> and the standard data of rhombohedral phased NiO.

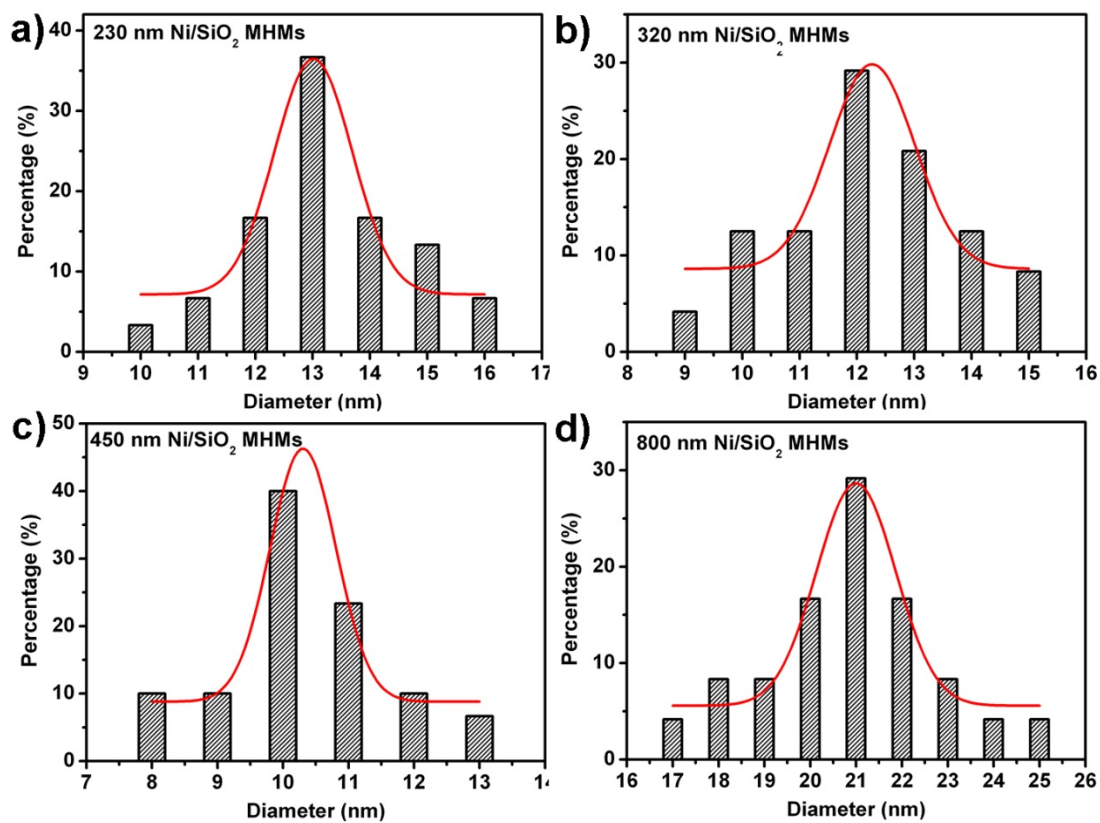

**Fig. S4** Size distribution histogram of the Ni NPs calculated from a single Ni/SiO<sub>2</sub> MHMs with the diameter of a) 230 nm, b) 320 nm, c) 450 nm and d) 800 nm.

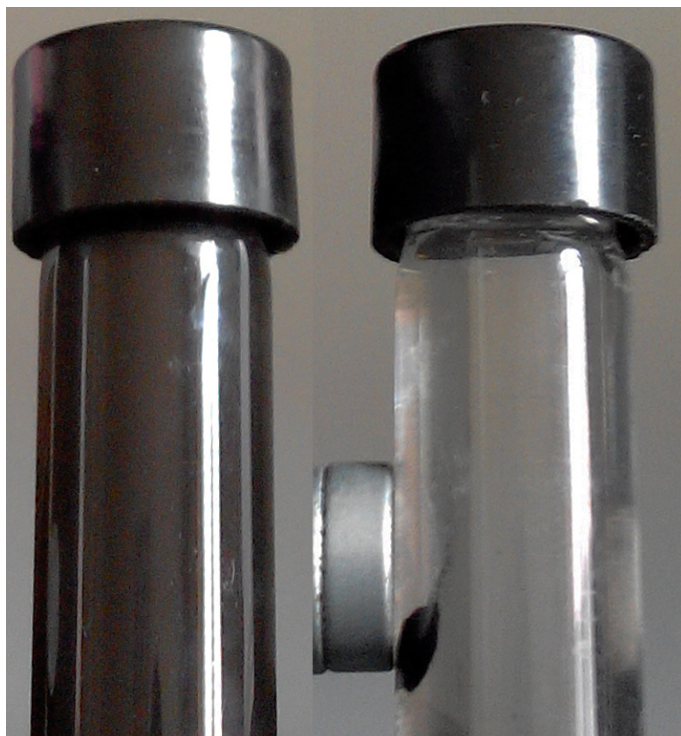

**Fig. S5** photograph for the magnetic separation of Ni/SiO<sub>2</sub> MHMs.

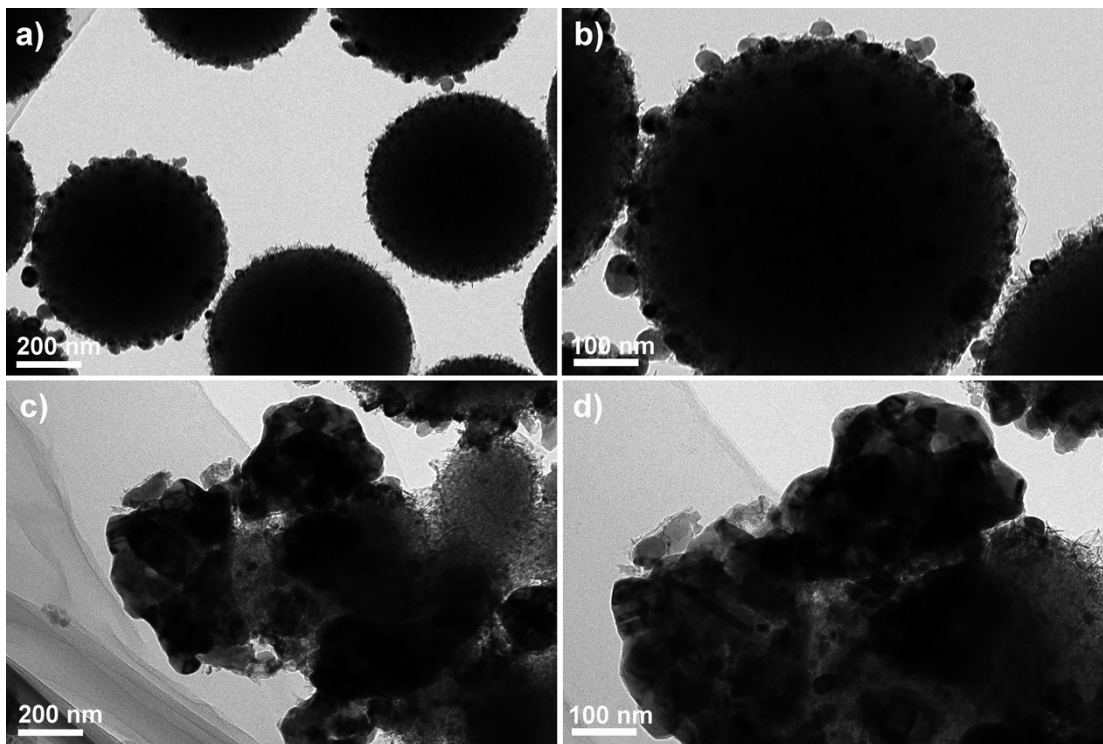

**Fig. S6** TEM images of Ni/SiO<sub>2</sub> synthesized by wet impregnation (a, b) and bare Ni NPs synthesized by calcination and reduction of Ni(NO<sub>3</sub>)<sub>3</sub> (c, d).



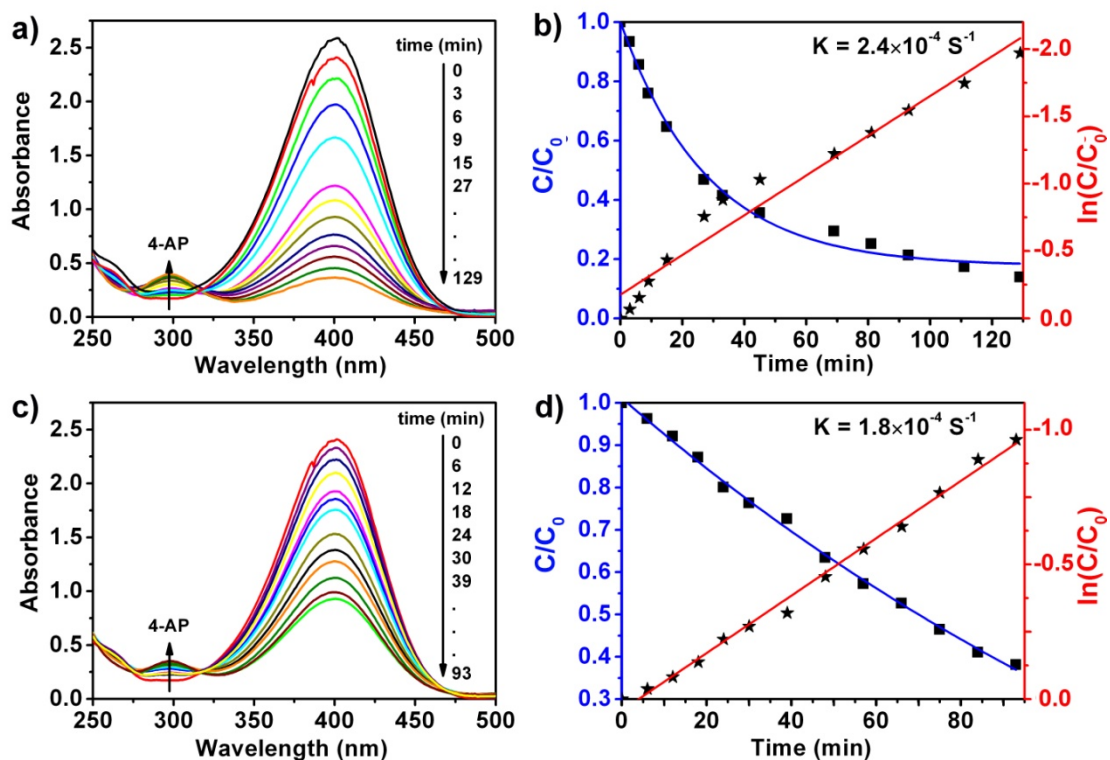

**Fig. S7** UV-vis spectra of the catalytic reduction of 4-NP to 4-AP developed at different reaction times over Ni/SiO<sub>2</sub> synthesized by wet impregnation (a) and bare Ni NPs synthesized by calcination and reduction of Ni(NO<sub>3</sub>)<sub>3</sub> (b);  $C/C_0$  and  $\ln(C/C_0)$  versus time for the reduction of 4-NP over Ni/SiO<sub>2</sub> synthesized by wet impregnation (c) and bare Ni NPs synthesized by calcination and reduction of Ni(NO<sub>3</sub>)<sub>3</sub> (d), the ratio of 4-NP concentration ( $C_t$  at time  $t$ ) to its initial value  $C_0$  is directly represented by the relative intensity of the respective absorption peak at 400 nm.

**Table S2** The ICP data of Ni/SiO<sub>2</sub> MHMs with different size before and after catalytic reaction.

|                                                 | Ni (μg/mg) | Si (μg/mg) |
|-------------------------------------------------|------------|------------|
| 230 nm Ni/SiO <sub>2</sub> MHMs                 | 14.6       | 24.3       |
| 320 nm Ni/SiO <sub>2</sub> MHMs                 | 16.4       | 29.5       |
| 450 nm Ni/SiO <sub>2</sub> MHMs                 | 13.2       | 27.6       |
| 800 nm Ni/SiO <sub>2</sub> MHMs                 | 14.4       | 25.2       |
| 230 nm Ni/SiO <sub>2</sub> MHMs after recycling | 12.4       | 25.6       |

For calculating the dispersion of Ni/SiO<sub>2</sub> HMHs, the equation can be formulated as follows (see Ref. S1 and S2)

$$\text{The number of nickel particles } N_1 = \frac{d_{Ni}}{\frac{2}{3}\pi\left(\frac{d_{Ni}}{2}\right)^2\rho_{Ni}}$$

$$\text{The overall surface area of Ni particles } S = 2\pi\left(\frac{d_{Ni}}{2}\right)^2N_1$$

$$\text{Dispersion} = \frac{N_S}{N_T} = \frac{Sk}{n_{Ni}N_A}$$

$$\text{Where } \rho_{Ni} = 8.90 \times 10^3 \text{ kg m}^{-3}$$

$N_S$  = total number of surface nickel atoms

$N_T$  = total number of nickel atoms

The nickel atom density (k) is  $1.54 \times 10^{19} \text{ m}^{-2}$

$$N_A = 6.02 \times 10^{23} \text{ mol}^{-1}$$

$$n_{Au} = m_{Au}/M_{Au}$$

Therefore, the equation can be written as:

$$\text{Dispersion} = \frac{10.06}{d_{Ni}} = \frac{5.03}{r_{Ni}}$$

## References

- 1 J. R. Anderson, *Structure of Metallic Catalysts*, Academic Press, 1975
- 2 Q. Bi, X. Du, Y. Liu, Y. Cao, H. He and K. Fan, *J. Am. Chem. Soc.*, 2012, **134**, 8926.
